# Supplementary material for: Sustainable Sulfur-rich Copolymer/Graphene Composite as Lithium-Sulfur Battery Cathode with Excellent Electrochemical Performance
Source: PubMed Central journal article supplement (PMC4848474; doi:10.1038/srep25207), 2016-04-28
Supplement: srep25207-s1.pdf [file srep25207-s1.pdf]

**Supporting information for**

**Sustainable Sulfur-rich Copolymer/Graphene Composite as Lithium-Sulfur Battery Cathode with Excellent Electrochemical Performance**

Arnab Ghosh<sup>1</sup>, Swapnil Shukla<sup>2</sup>, Gaganpreet Singh Khosla<sup>2</sup>, Bimlesh Lochab<sup>2\*</sup> & Sagar Mitra<sup>1\*</sup>

<sup>1</sup>Electrochemical Energy Storage Laboratory, Department of Energy Science and Engineering, Indian Institute of Technology, Bombay, Powai, Mumbai 400076, INDIA.

<sup>2</sup>Department of Chemistry, School of Natural Sciences, Shiv Nadar University, Gautam Budh Nagar, Uttar Pradesh 203207, INDIA.

Corresponding Authors\*:

[sagar.mitra@iitb.ac.in](mailto:sagar.mitra@iitb.ac.in)

[bimlesh.lochab@snu.edu.in](mailto:bimlesh.lochab@snu.edu.in)

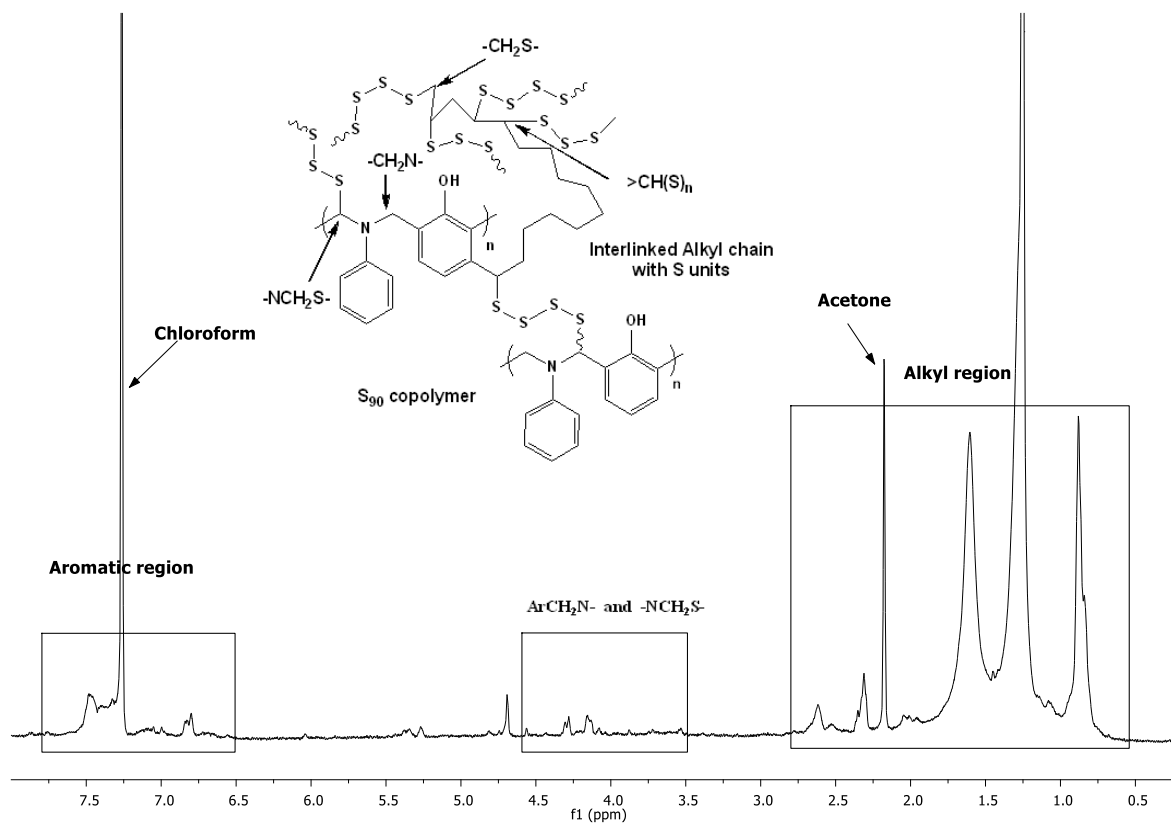

**Figure S1.**  $^1\text{H-NMR}$  of S<sub>90</sub> in  $\text{CDCl}_3$  solvent.

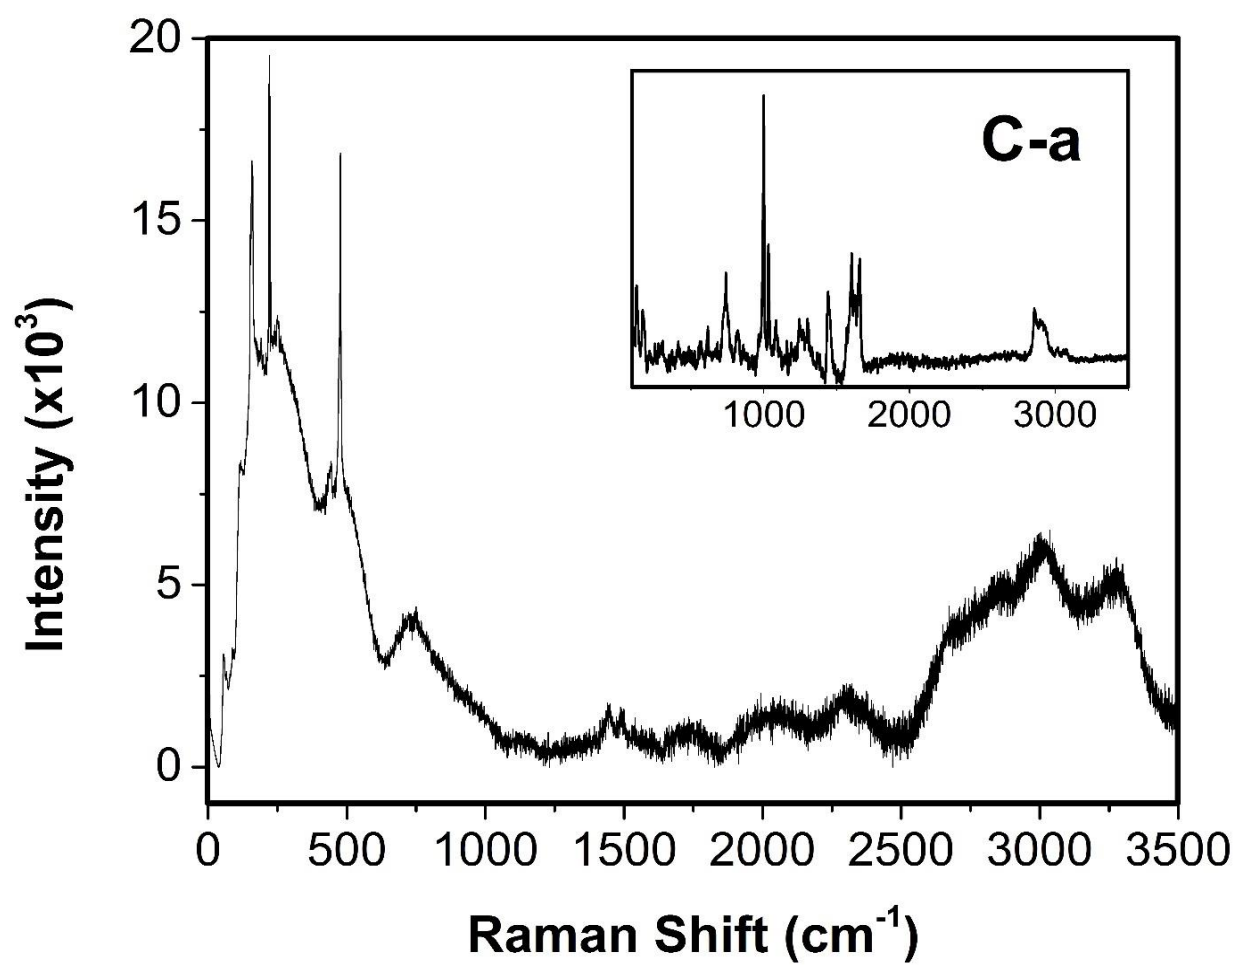

**Figure S2.** Raman spectra of S90; inset Raman spectra of C-a.

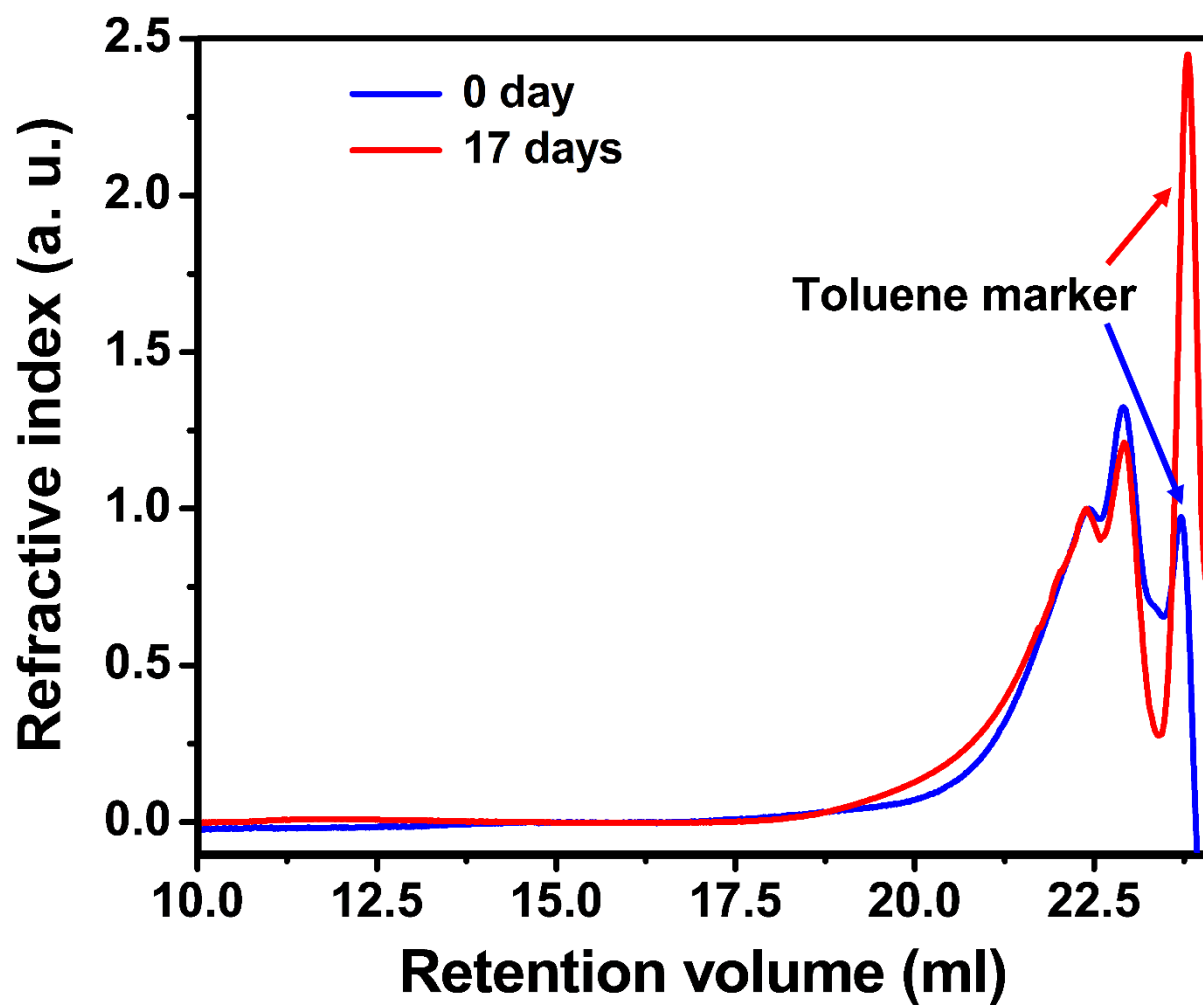

Figure S3. Normalised GPC trace of S90 copolymer at different period of storage.

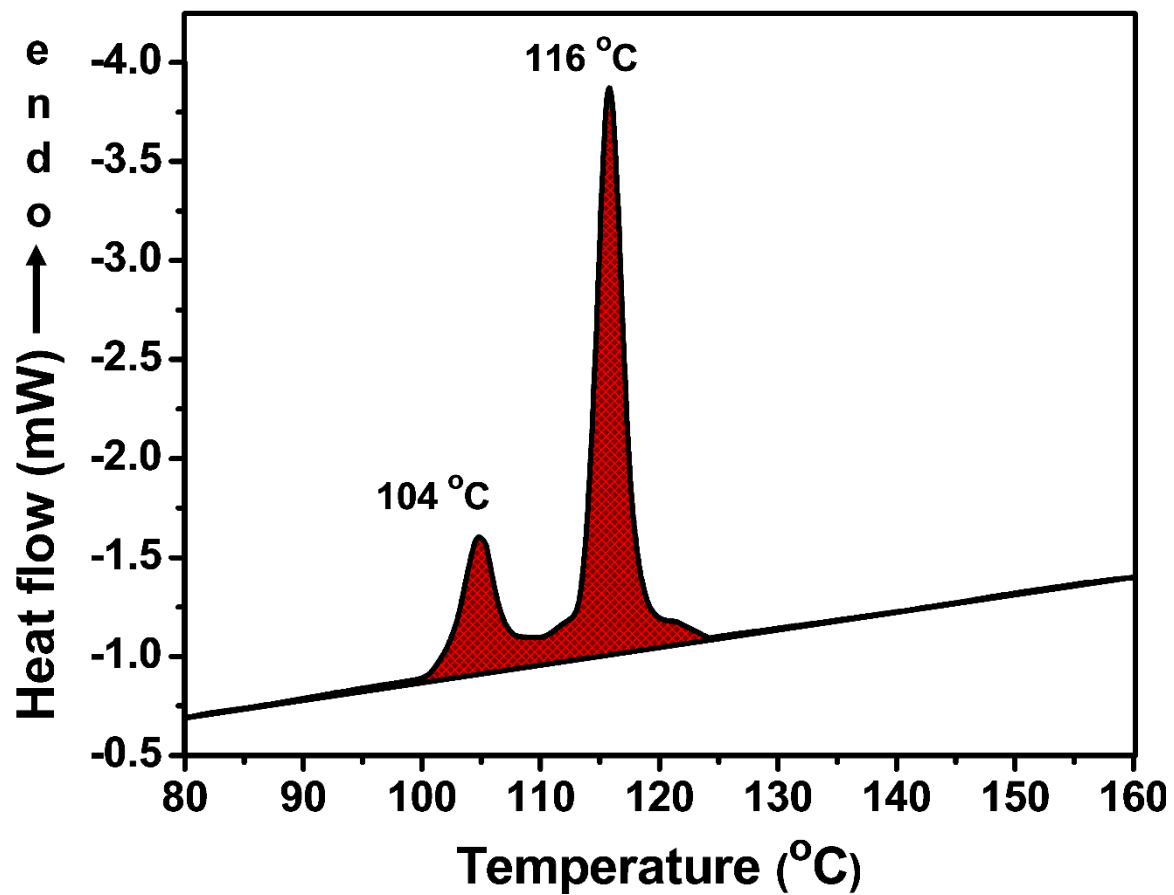

Figure S4. DSC trace of S90 copolymer.

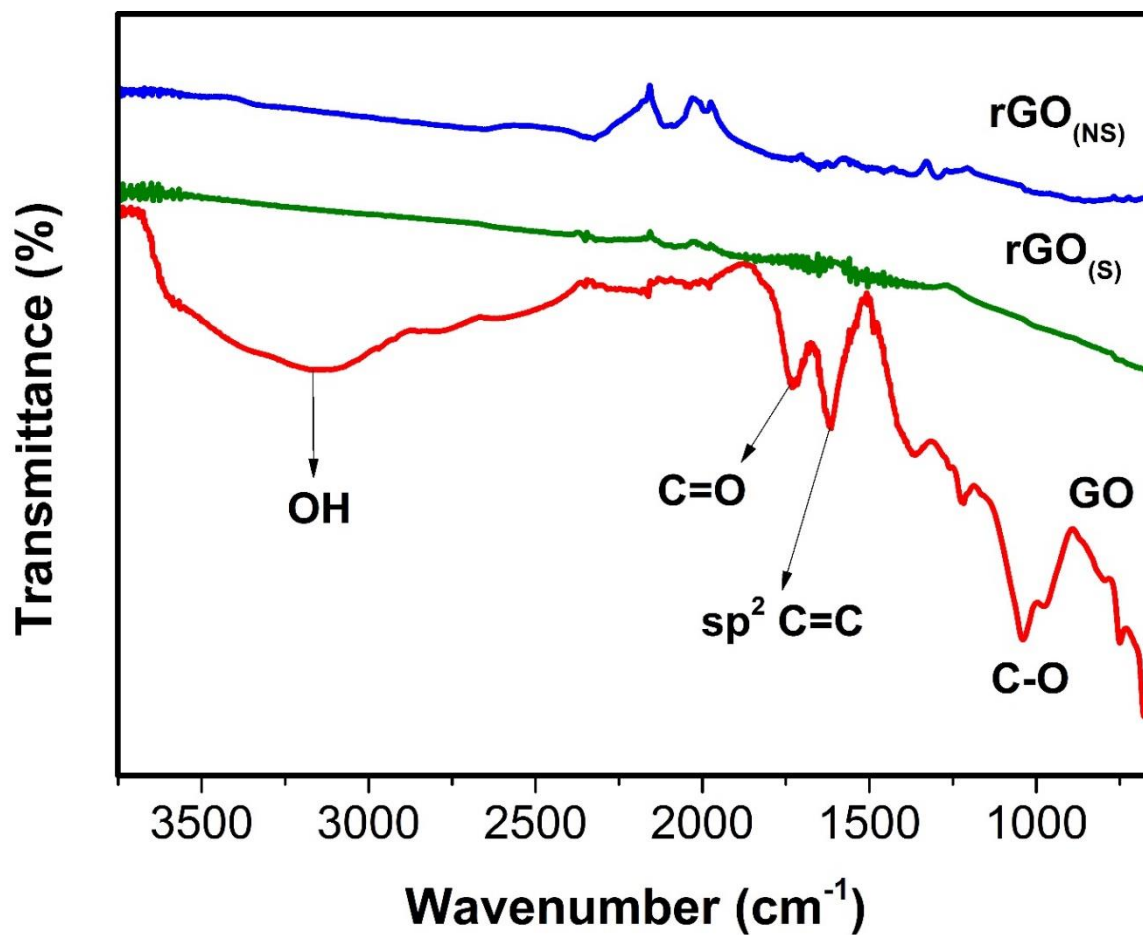

**Figure S5.** FTIR spectra of graphene oxide (GO),  $\text{rGO}_{(\text{S})}$  and  $\text{rGO}_{(\text{NS})}$ .

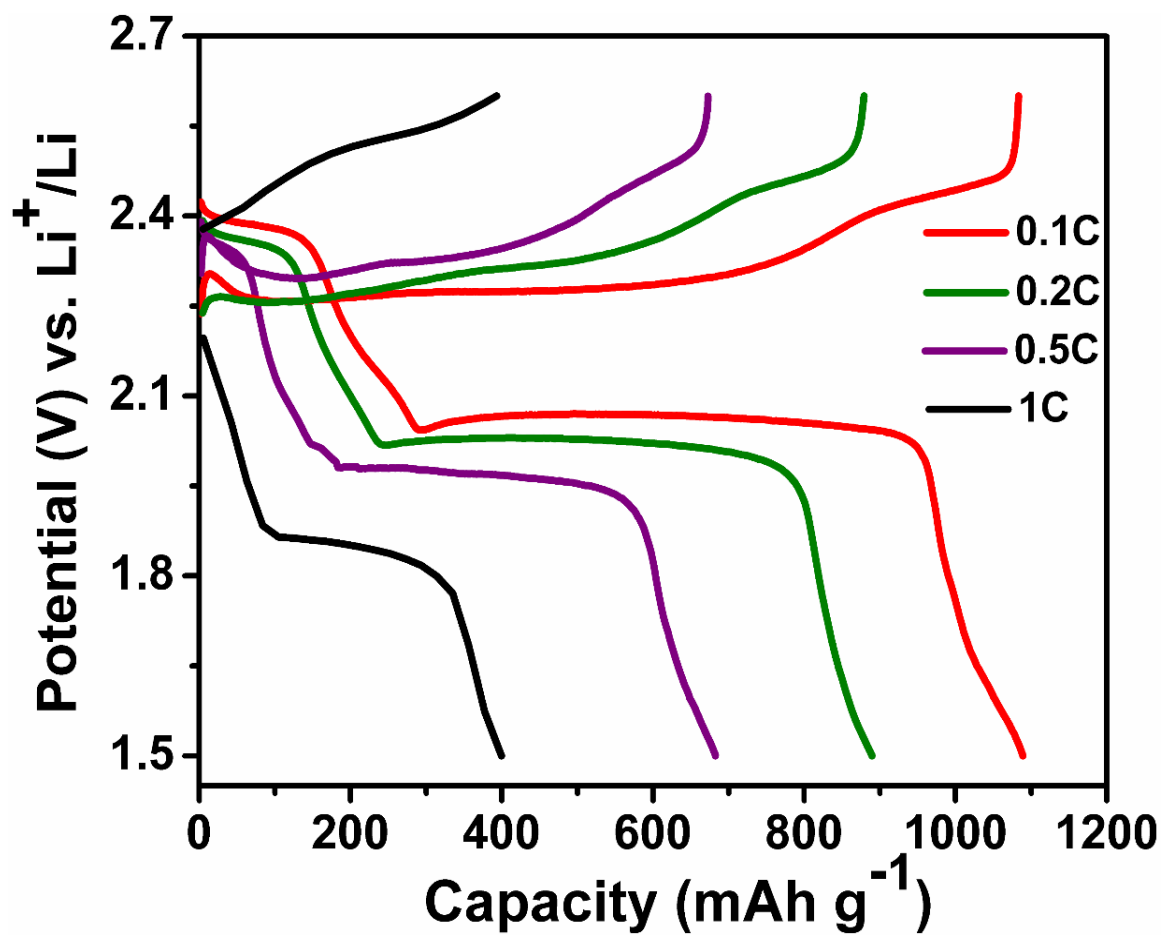

**Figure S6.** Charge-discharge profiles of S90-rGO<sub>(s)</sub> composite at different current rates.

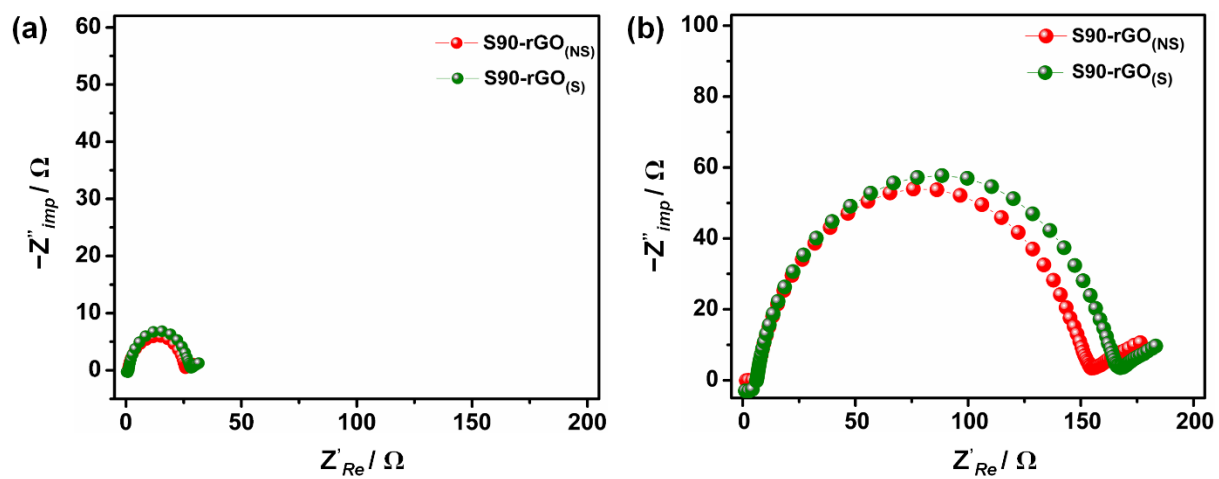

**Figure S7.** Nyquist plots of S90-2.5% rGO<sub>(S)</sub> and S90-2.5% rGO<sub>(NS)</sub> composites electrodes – (a) before cycling and (b) after 100 cycles (at fully charged state).



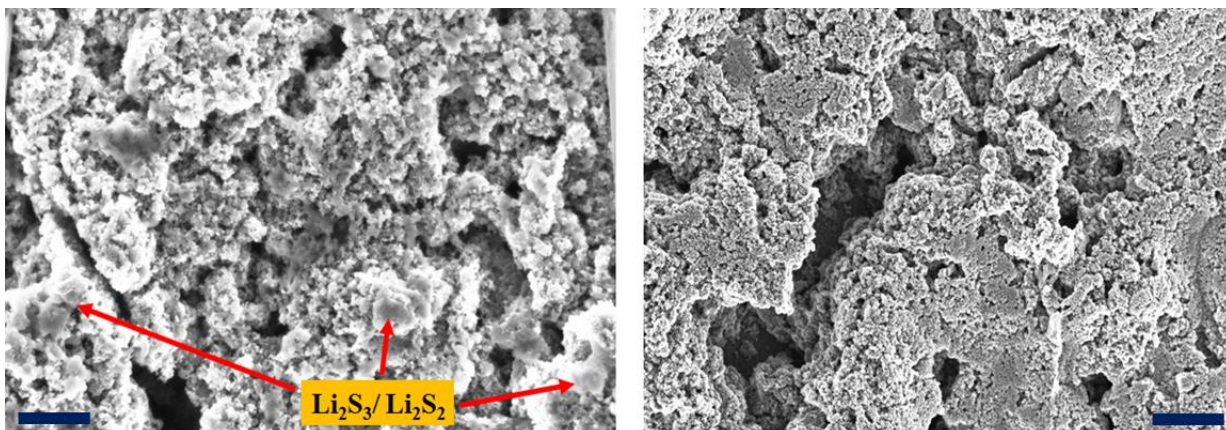

**Figure S8.** SEM images of elemental sulfur electrode (left) and S90 copolymer electrode (right) after 50 cycles at fully charged state (scale bar: 2  $\mu\text{m}$ ).

| Materials                                                                     | Sulfur Loading | Initial discharge capacity                           | Capacity loss per cycle |         |
|-------------------------------------------------------------------------------|----------------|------------------------------------------------------|-------------------------|---------|
|                                                                               |                |                                                      | Cycles                  | Loss    |
| Poly (S-r-Ca)/2.5 wt% rGOs ( <i>This work</i> )                               | 87.7 wt%       | 807 mA h g <sup>-1</sup> (1000 mA g <sup>-1</sup> )  | 300                     | 0.04 %  |
|                                                                               |                | 502 mA h g <sup>-1</sup> (2000 mA g <sup>-1</sup> )  | 500                     | 0.06 %  |
| Graphene/sulfur <sup>1</sup>                                                  | 70 wt%         | 1000 mA h g <sup>-1</sup> (1500 mA g <sup>-1</sup> ) | 300                     | 0.1 %   |
| Amino-functionalized reduced graphene oxide <sup>2</sup>                      | 60 wt%         | 810 mA h g <sup>-1</sup> (836 mA g <sup>-1</sup> )   | 300                     | 0.057 % |
| Graphene wrapped N-doped double shelled hollow carbon sphere <sup>3</sup>     | 78 wt%         | 850 mA h g <sup>-1</sup> (836 mA g <sup>-1</sup> )   | 200                     | 0.19 %  |
| Ultra-high surface-area hollow carbon nanosphere <sup>4</sup>                 | 67 wt%         | 750 mA h g <sup>-1</sup> (1672 mA g <sup>-1</sup> )  | 500                     | 0.053 % |
| Sulfur infiltrated graphene based layered porous carbon <sup>5</sup>          | 68 wt%         | 900 mA h g <sup>-1</sup> (836 mA g <sup>-1</sup> )   | 100                     | 0.3 %   |
| Coaxial graphene wrapped sulfur-coated carbon nanofibers <sup>6</sup>         | 50 wt%         | 615 mA h g <sup>-1</sup> (1672 mA g <sup>-1</sup> )  | 1500                    | 0.043 % |
| Hollow carbon nanofibers filled with MnO <sub>2</sub> nanosheets <sup>7</sup> | 71%            | 915 mA h g <sup>-1</sup> (836 mA g <sup>-1</sup> )   | 300                     | 0.08 %  |

**Table 1:** Comparison of our sulfur copolymer cathode with previously reported sulfur cathode material structures in terms of specific capacity and cycling stability.

## References

S1. Zhou, G. *et al. Adv. Mater.* **26**, 625-631 (2014).

S2. Wang, Z. *et al. Nat. Commun.* **5**, 5002 (2014).

S3. Zhou, G., Zhao, Y. & Manthiram, A. *Adv. Energy Mater.* **5**, 1402263 (2015).

- S4. Xu, F. *et al. Nat. Commun.* **6**, 7221 (2015).
- S5. Yang, X., Zhang, L., Zhang, F., Huang, Y. & Chen, Y. *ACS Nano* **8**, 5208-5215 (2014).
- S6. Lu, S., Cheng, Y., Wu, X. & Liu, J. *Nano Lett.* **13**, 2485-2489 (2013).
- S7. Li, Z., Zhang, J. & Lou, X.W. *Angew. Chem. Int. Ed.* **127**, 13078-13082 (2015).
